# Supplementary material for: Brightness and AIEE behaviour of methylenebis(4,1-phenylene) linkage electron donor–acceptor-based dyads and their implications for robust quantification of explosive picric acid in both aqueous medium and solid state
Source: Royal Society of Chemistry journal article supplement (doi:10.1039/d4cp04294h), 2024-12-09
Supplement: d4cp04294h1.pdf [file d4cp04294h1.pdf]

*Supporting Information for*

**Brightness and AIEE Behaviour of Methylenebis(4,1-phenylene) Linkage Electron  
Donor-Acceptor-based Dyad and Its Implications for Robust Quantification of  
Explosive Picric Acid in both Aqueous Medium and Solid State**

Manas Mahato<sup>a</sup>, Tuhina Sultana<sup>a</sup>, Rajkumar Sahoo<sup>b</sup>, Sabbir Ahamed<sup>a</sup>, Najmin Tohora<sup>a</sup>,  
Arpita Maiti<sup>a</sup> and Sudhir Kumar Das<sup>a\*</sup>

<sup>a</sup>Department of Chemistry, University of North Bengal, Raja Rammohunpur, Darjeeling,  
West Bengal-734013, India

<sup>b</sup>Department of Chemistry, Indian Institute of Technology, Kharagpur, West Bengal-721302,  
India

Corresponding author: (Dr. S. K. Das; E-mail: [sudhirkumardas@nbu.ac.in](mailto:sudhirkumardas@nbu.ac.in))

**S1: Synthesis procedure of MBH**

At first desalted pyridoxal hydrochloride by a simple neutralization method. For this purpose, pyridoxal hydrochloride is stirred with an equivalent amount of potassium hydroxide (KOH) for 3 h to get the resulting pyridoxal. 4,4'-methylenediamine (50 mg, 0.252 mmol) was added to 3-hydroxy-5-(hydroxymethyl)-2-methylisonicotinaldehyde (pyridoxal) (0.504 mmol, 84.24 mg) in 3 mL of MeOH with the following addition of a catalytic amount of acetic acid and then refluxed for 8 h. TLC was used to monitor the progress of the reaction. After condensation, the reaction mixture was cooled, and orange colored solid was filtered and washed systematically with MeOH, after which it was dried in a desiccator. Yield: 91%

**Characterizations:** <sup>1</sup>H NMR (400 MHz, DMSO-d<sub>6</sub>, 25 °C) δ(ppm): 13.98 s, (1H, -OH), 9.16 s, (1H, -CH=N), 7.98 s, (1H), 7.46 d, (1H), 7.41 d, (1H), 5.43 s, (1H, -OH), 4.77 d, (1H), 4.06 s, (1H), 2.42 s, (1H, -CH<sub>3</sub>), (**Fig. S1**). <sup>13</sup>C NMR (100 MHz, δ (ppm), DMSO-d<sub>6</sub>): 161.21, 153.61, 148.62, 145.77, 141.66, 138.52, 134.12, 130.37, 122.34, 122.14, 120.32, 58.79, 19.18

(Fig. S2) and the mass spectra  $m/z$  is found to be 497.2198 (Fig. S3) confirming the formation of our MBH.

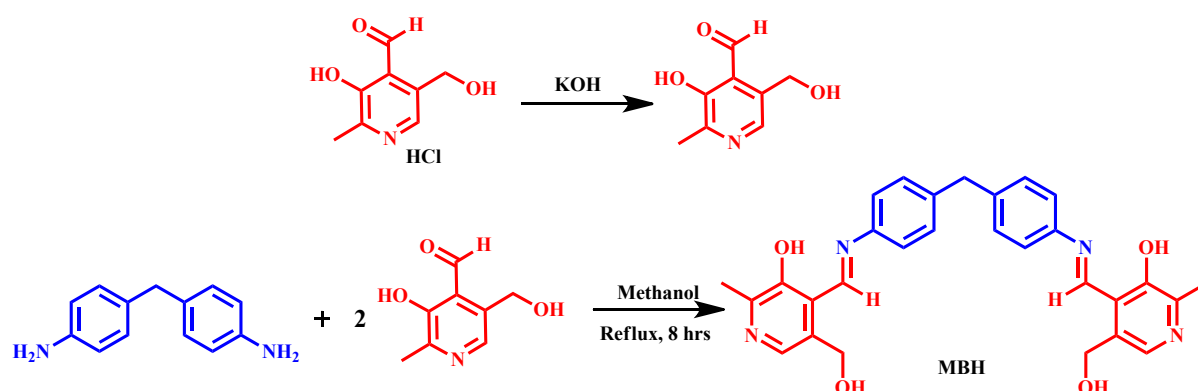

**Scheme S1:** Synthetic procedure of our desired probe MBH.

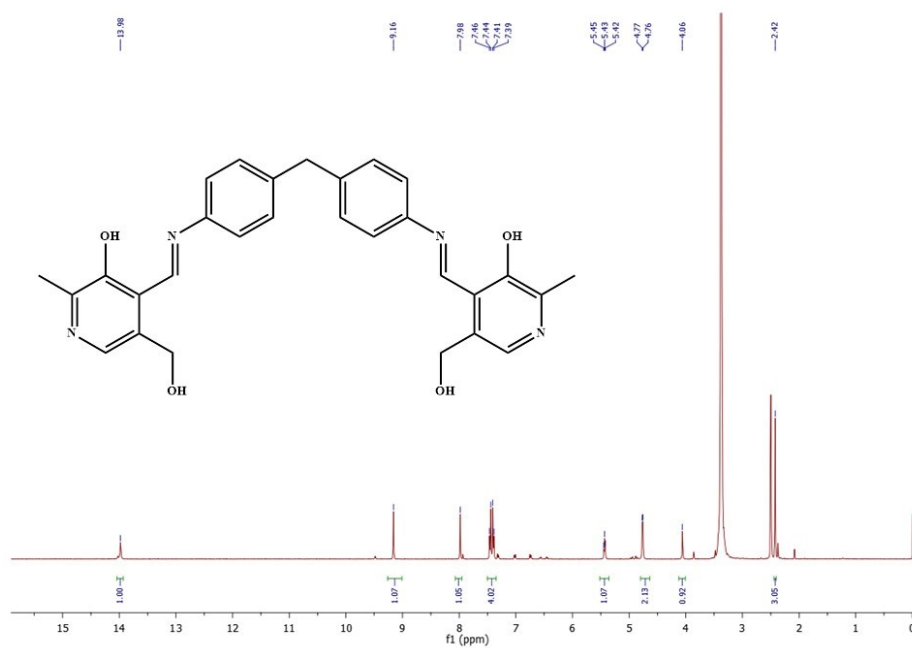

**Fig. S1**  $^1\text{H}$  NMR of probe MBH.

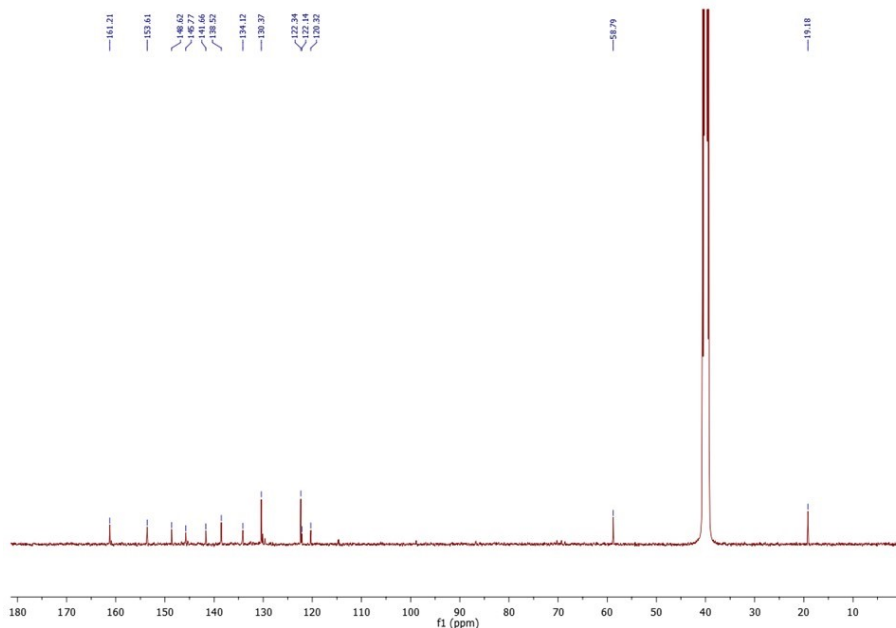

**Fig. S2**  $^{13}\text{C}$  NMR of probe MBH.

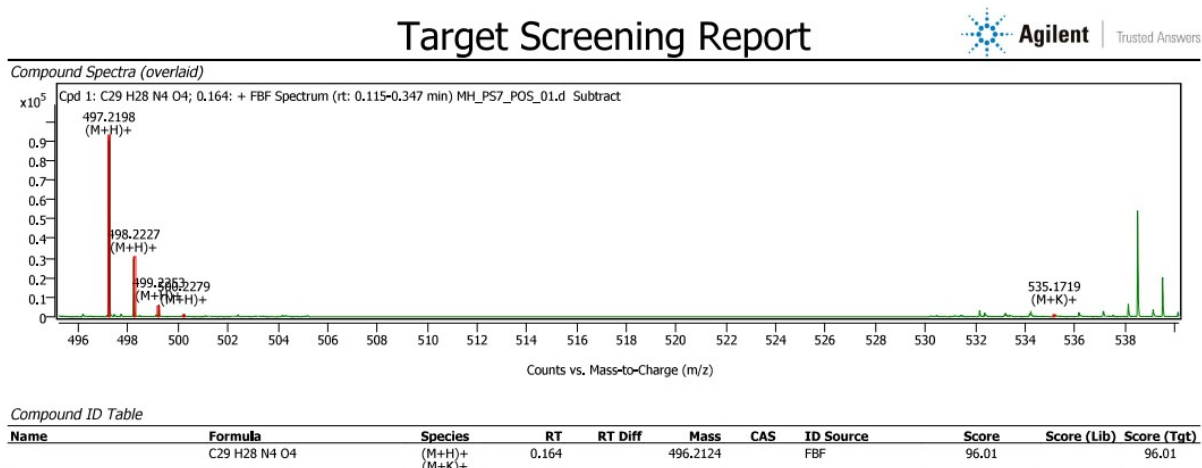

**Fig. S3** HRMS spectra of probe MBH.

## S2: Synthesis procedure of MBA

4,4'-methylenediamine (50 mg, 0.252 mmol) was added to 2-hydroxy-1-naphthaldehyde (0.504 mmol, 86.77 mg) in 3 mL of MeOH with the following addition of a catalytic amount of acetic acid and then refluxed for 7 h. TLC was used to monitor the progress of the reaction. After condensation, the reaction mixture was cooled, and a deep yellow-colored solid was filtered and washed systematically with MeOH, after which it was dried in a desiccator. Yield: 92%

**Characterizations:**  $^1\text{H}$  NMR (400 MHz,  $\text{DMSO-d}_6$ , 25 °C)  $\delta(\text{ppm})$ : 15.88 s, (1H, -OH), 9.62 s, (1H, -CH=N), 8.47 d, (2H), 7.92 d, (1H), 7.79 d, (1H), 7.55 t, (1H), 7.35 t, (1H), 7.30 d, (1H), 6.99 d, (1H), 6.91 d, (1H), 6.52 d, (1H), 3.79 s, (1H) (**Fig. S4**).  $^{13}\text{C}$  NMR (100 MHz,  $\delta$  (ppm)  $\text{DMSO-d}_6$ ): 173.56, 157.33, 149.29, 143.75, 139.44, 135.85, 132.33, 131.84, 131.67, 130.74, 129.23, 126.06, 125.04, 123.05, 116.78, 111.03 (**Fig. S5**) and the mass spectra  $m/z$  is found to be 507.2085 (**Fig. S6**) confirming the formation of our **MBA**.

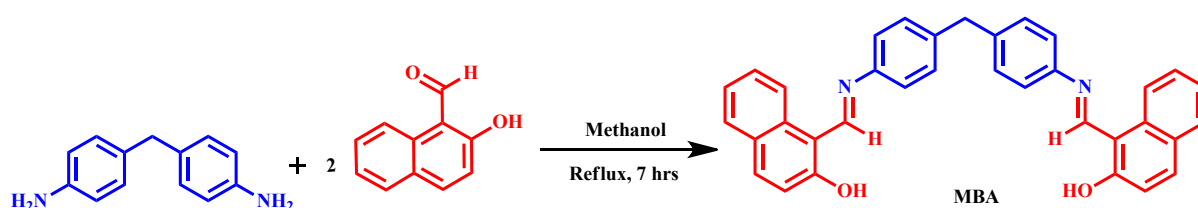

**Scheme S2:** Synthetic procedure of our desired probe **MBA**.

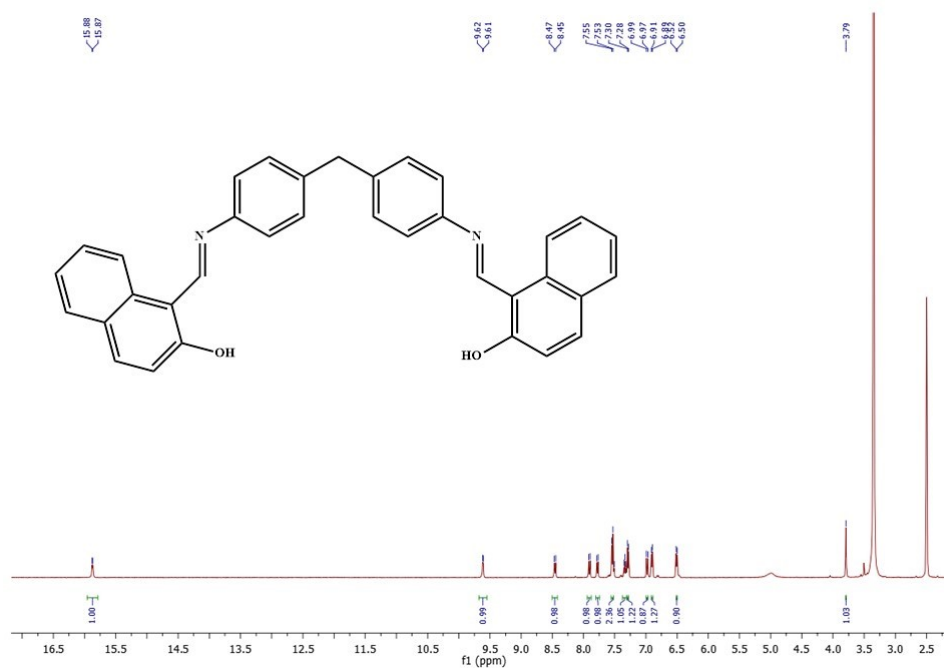

**Fig. S4**  $^1\text{H}$  NMR of probe **MBA**.

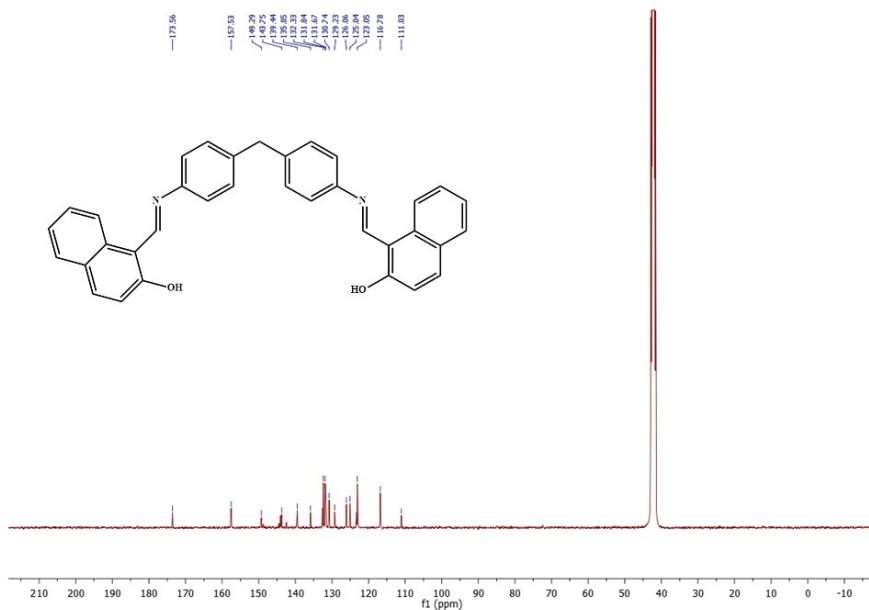

**Fig. S5**  $^{13}\text{C}$  NMR of probe MBA.

## Target Screening Report

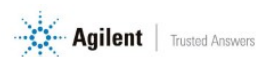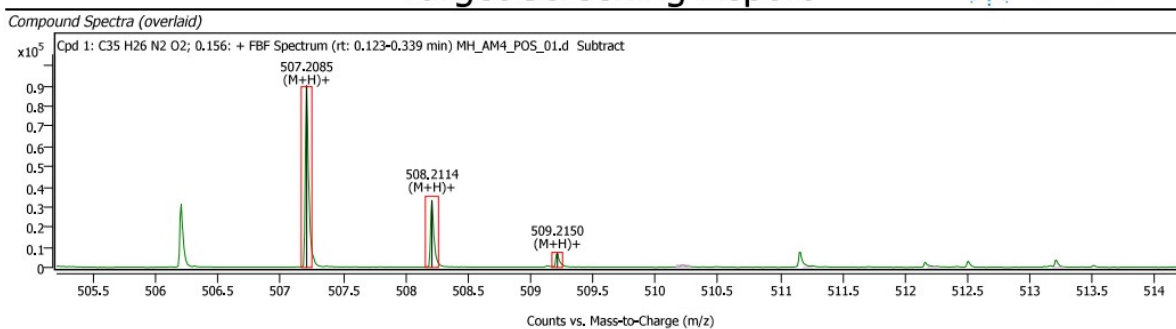

Compound ID Table

| Name | Formula       | Species | RT    | RT Diff | Mass     | CAS | ID Source | Score | Score (Lib) | Score (Tgt) |
|------|---------------|---------|-------|---------|----------|-----|-----------|-------|-------------|-------------|
|      | C35 H26 N2 O2 | (M+H)+  | 0.156 |         | 506.2011 |     | FBF       | 93.61 |             | 93.61       |

**Fig. S6** HRMS spectra of probe MBA.

### S3: Synthesis procedure of MBB

4,4'-methylenediamine (50 mg, 0.252 mmol) was added to 2-hydroxybenzaldehyde (0.504 mmol, 61.55 mg) in 3 mL of MeOH with the following addition of a catalytic amount of acetic acid and then refluxed for 8 h. TLC was used to monitor the progress of the reaction. After condensation, the reaction mixture was cooled, and a light yellow-colored solid was filtered and washed systematically with MeOH, after which it was dried in a desiccator. Yield: 94%

**Characterizations:**  $^1\text{H}$  NMR (400 MHz,  $\text{DMSO-d}_6$ , 25 °C)  $\delta(\text{ppm})$ : 13.16 s, (1H, -OH), 8.94 s, (1H, -CH=N), 7.64 d, (1H), 7.42 d, (1H), 7.38 t, (1H), 6.99 t, (1H), 4.02 s, (1H) (**Fig. S7**).  $^{13}\text{C}$  NMR (100 MHz,  $\delta$  (ppm)  $\text{DMSO-d}_6$ ): 163.46, 160.74, 146.52, 140.67, 133.64, 132.98, 130.23, 129.67, 121.98, 119.59, 117.04, 70.24 (**Fig. S8**) and the mass spectra  $m/z$  is found to be 407.1779 (**Fig. S9**) confirming the formation of our **MBB**.

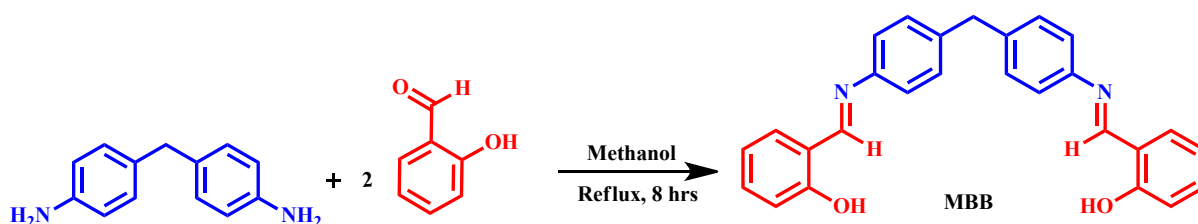

**Scheme S3:** Synthetic procedure of our desired probe **MBB**.

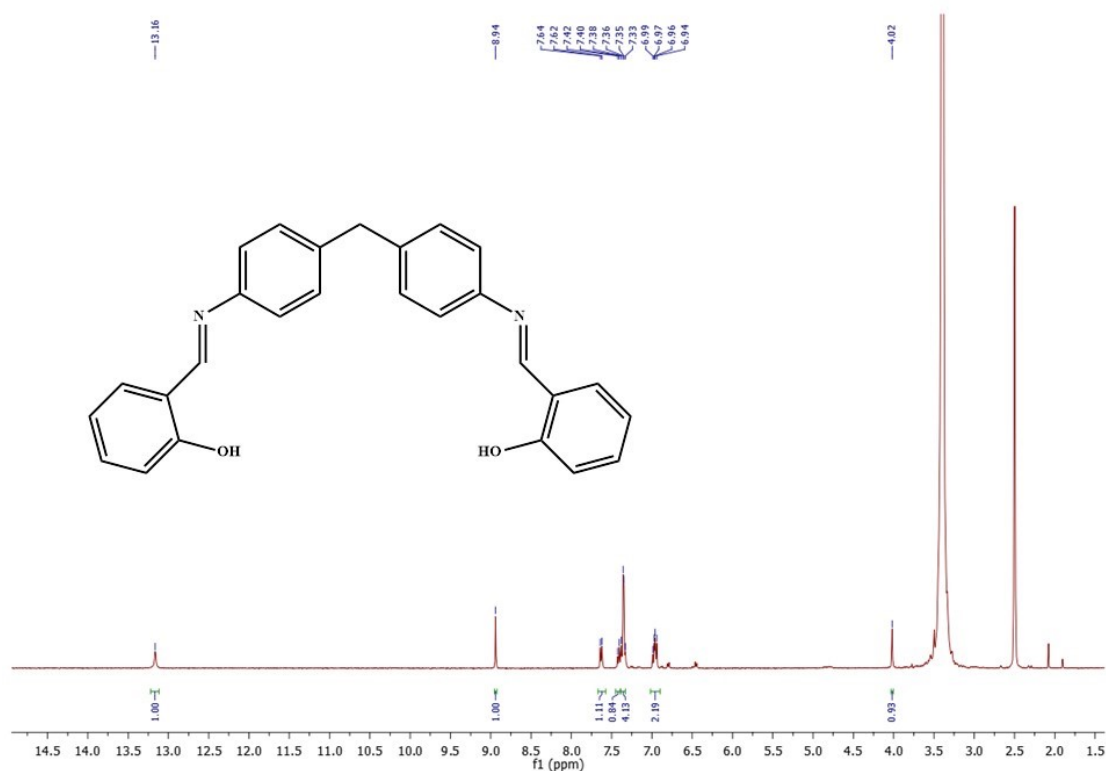

**Fig. S7**  $^1\text{H}$  NMR of probe **MBB**.

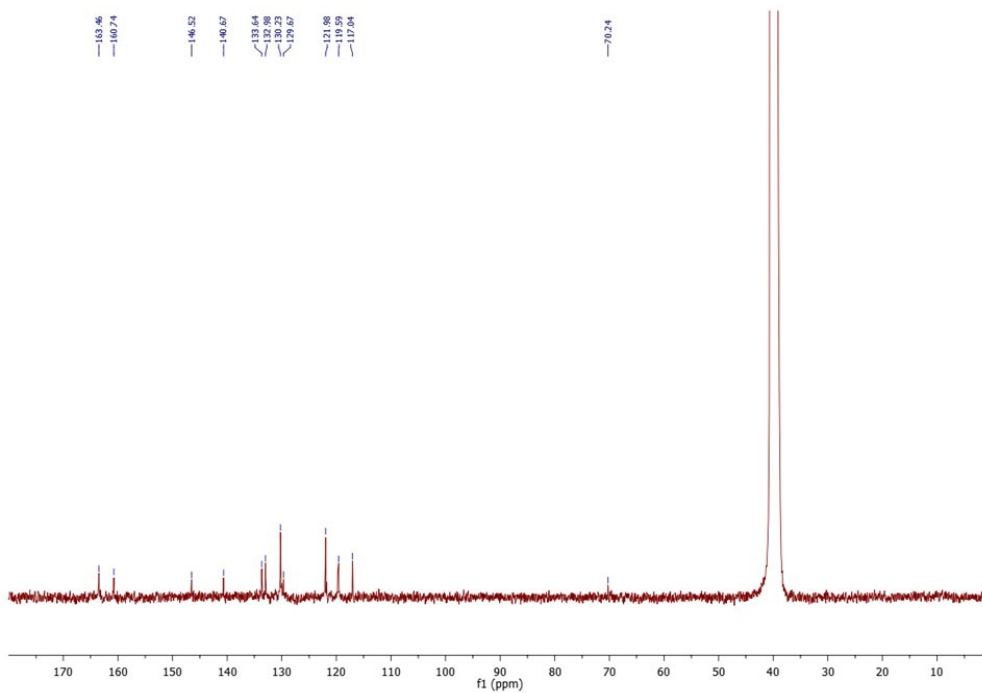

**Fig. S8**  $^{13}\text{C}$  NMR of probe **MBB**.

## Target Screening Report

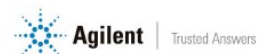

### Compound Spectra (overlaid)

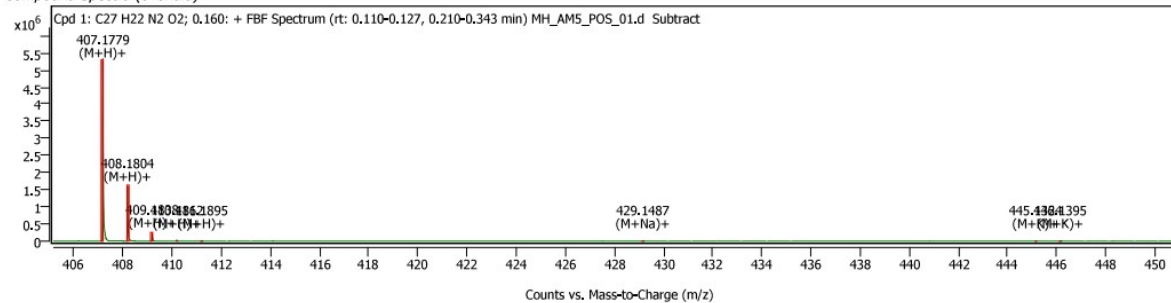

### Compound ID Table

| Name | Formula       | Species                     | RT    | RT Diff | Mass     | CAS | ID Source | Score | Score (Lib) | Score (Tot) |
|------|---------------|-----------------------------|-------|---------|----------|-----|-----------|-------|-------------|-------------|
|      | C27 H22 N2 O2 | (M+H)+<br>(M+Na)+<br>(M+K)+ | 0.160 |         | 406.1704 |     | FBF       | 87.33 |             | 87.33       |

**Fig. S9** HRMS spectra of probe **MBB**.

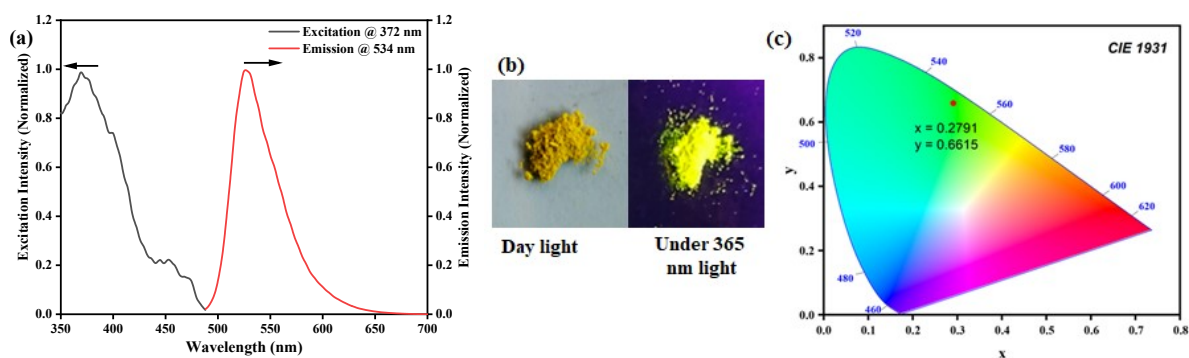

**Fig. S10 (a)** Excitation and emission spectra of our developed probe **MBB** **(b)** photograph of our neat probe in daylight (left) and under UV light 365 nm (right). **(c)** Corresponding color chromaticity diagram of our neat solid probe.

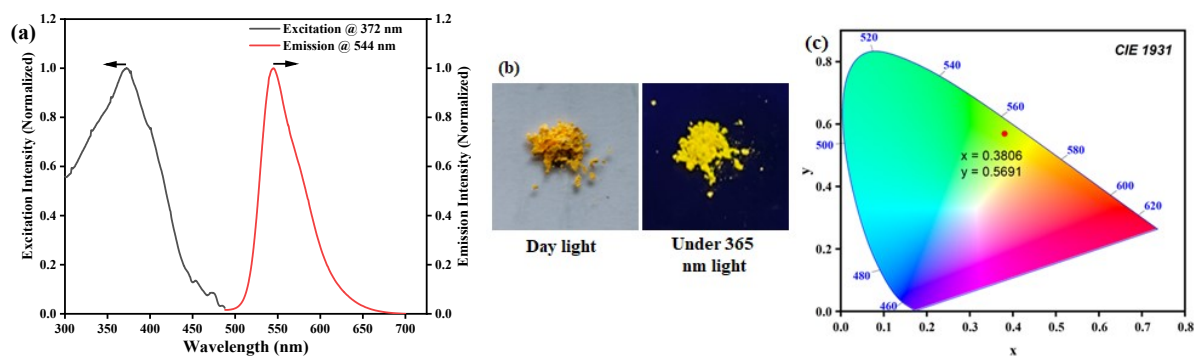

**Fig. S11 (a)** Excitation and emission spectra of our developed probe **MBH** **(b)** photograph of our neat probe in daylight (left) and under UV light 365 nm (right). **(c)** Corresponding color chromaticity diagram of our neat solid probe.

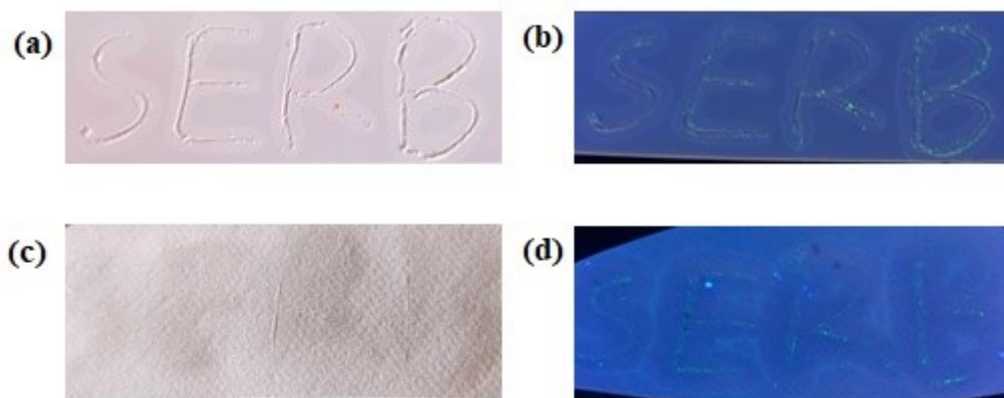



**Fig. S12** Visibility of the SERB letter, written by neat probe **MBA** in daylight **(a) (c)** and under UV light 365 nm **(b) (d)** on the surface off TLC plate and Whatman-41 filter paper.

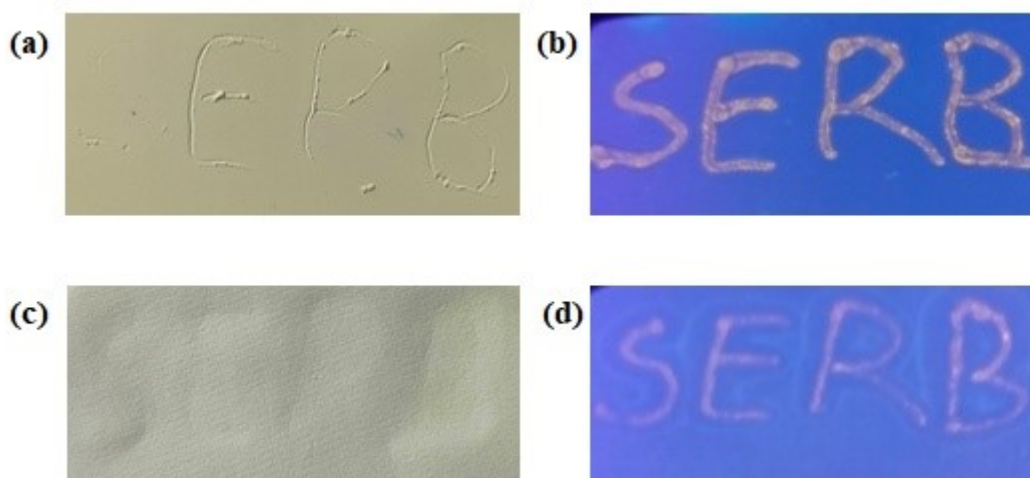

**Fig. S13** Visibility of the SERB letter, written by neat probe **MBH** in daylight **(a) (c)** and under UV light 365 nm **(b) (d)** on the surface off TLC plate and Whatman-41 filter paper.

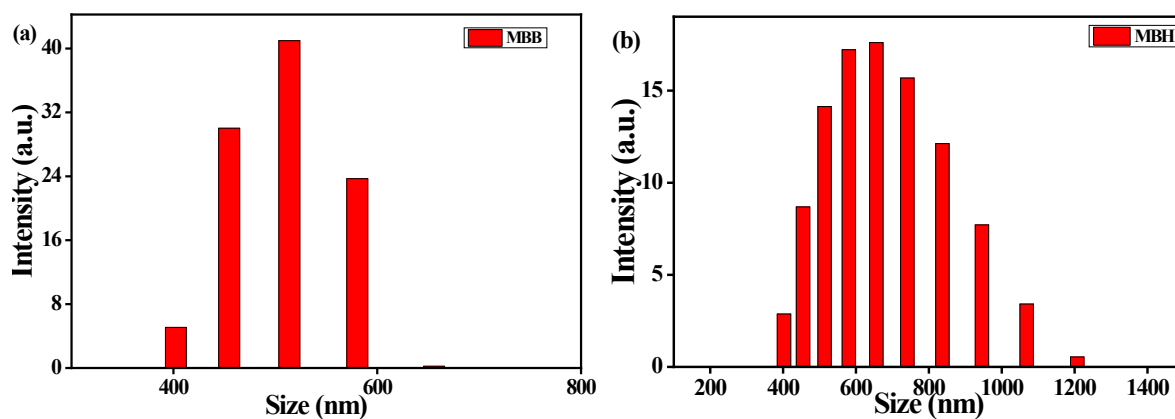

**Fig. S14** Dynamic light scattering (DLS) spectrum of probe **(a) MBB**, **(b) MBH**

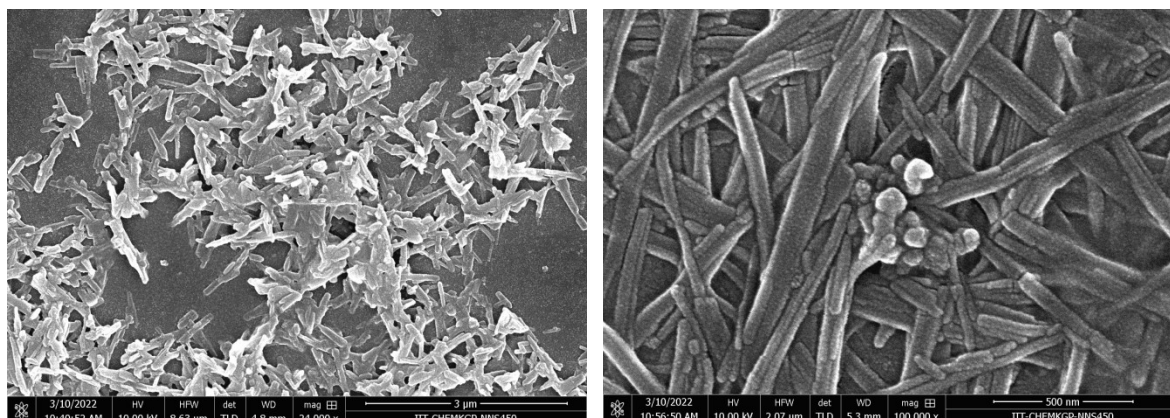

**Fig. S15** SEM images of the fabricated low dimensional particle of our probe **MBB** (left) and **MBH** (right).

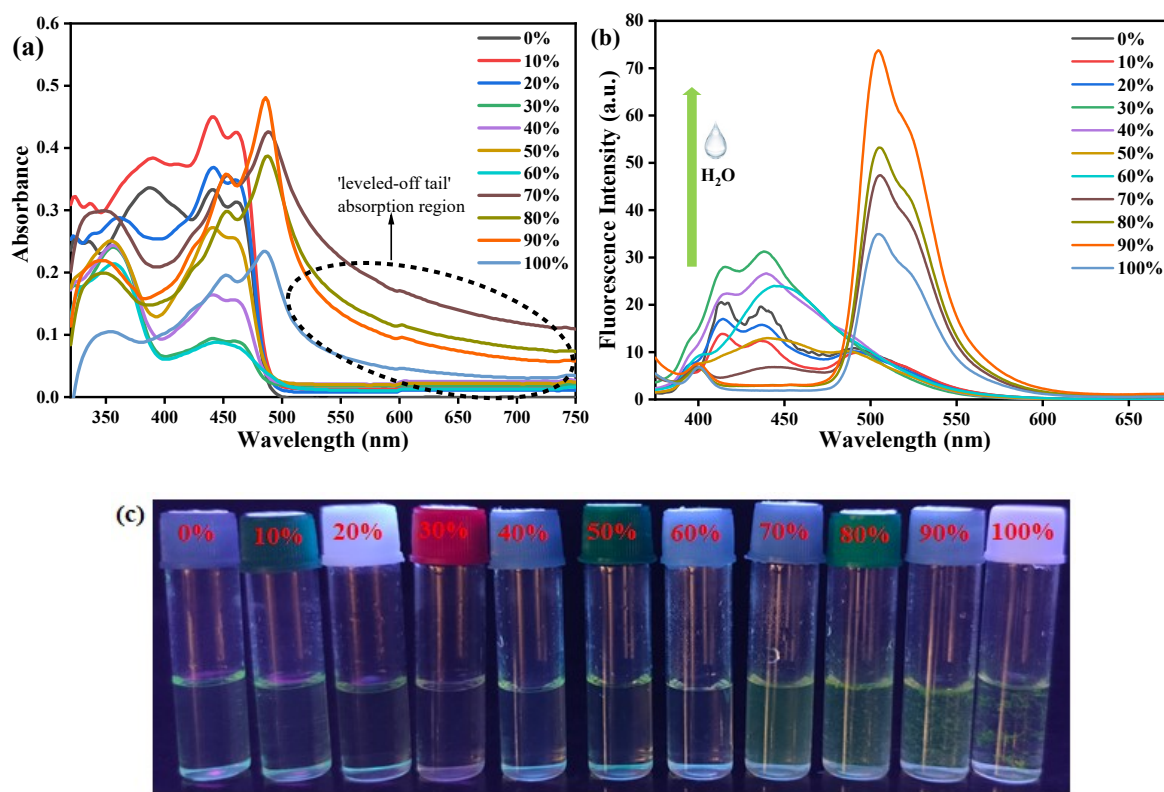

**Fig. S16** (a) Changes in the absorbance spectrum of **MBA** upon increasing the water percentage in DMSO (from 0% to 100%). (b) Emission spectra of **MBA** in increasing aqueous medium (from 0% to 100%). (c) Pictorial presentation of nanoparticles formation upon increasing volume of water.

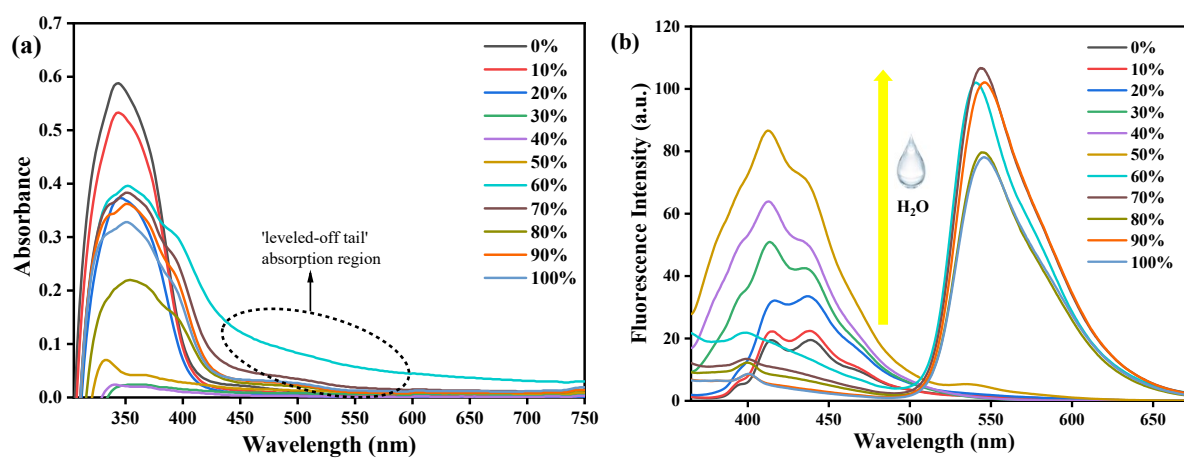

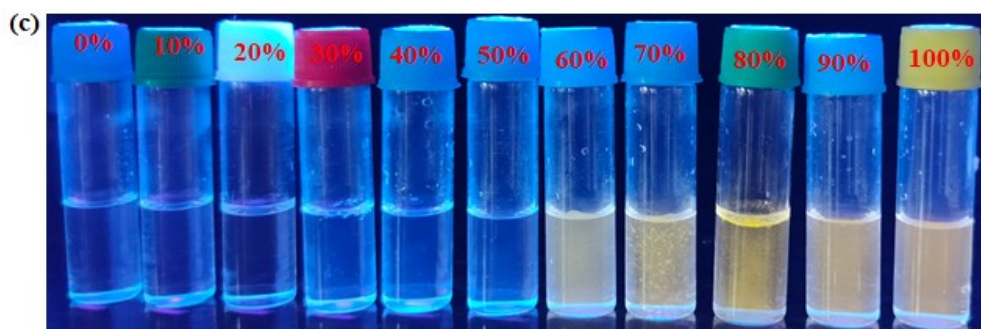

**Fig. S17** (a) Changes in the absorbance spectrum of **MBH** upon increasing the water percentage in DMSO (from 0% to 100%). (b) Emission spectra of **MBH** in increasing aqueous medium (from 0% to 100%). (c) Pictorial presentation of nanoparticles formation upon increasing volume of water.

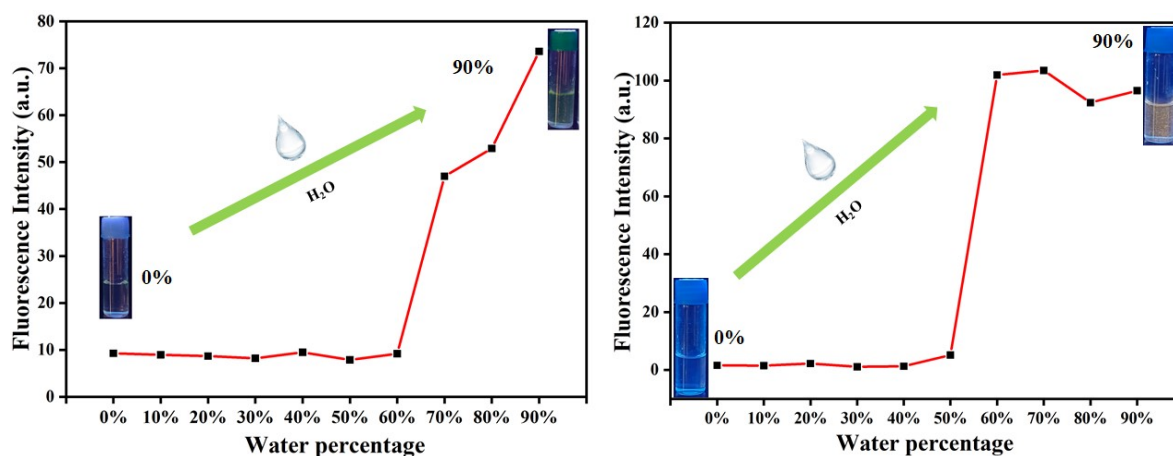

**Fig. S18** Emission intensity changes of probe **MBA** (left) and **MBH** (right) in DMSO/H<sub>2</sub>O mixture upon difference water percentages Inset: pictorial change of 0% water (colorless) and 90% water (green and yellow color) under UV light (365 nm).

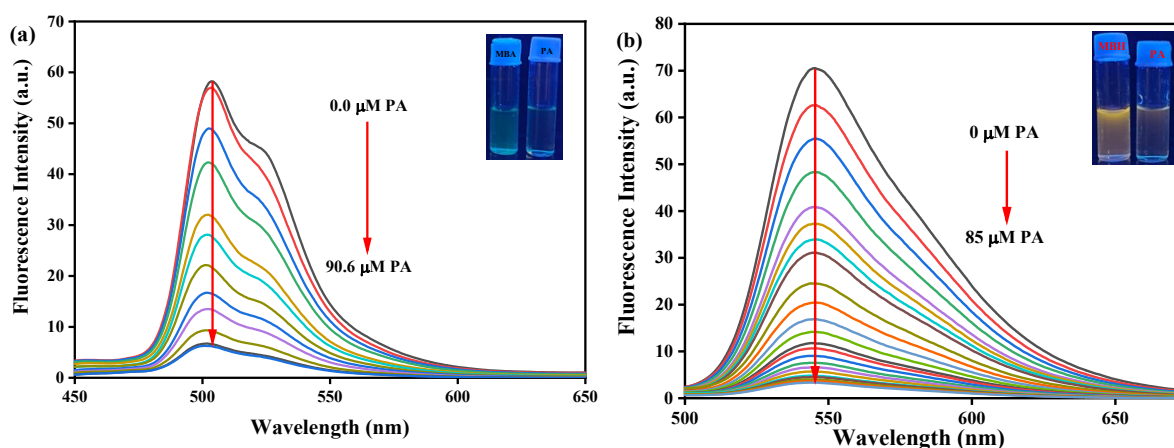

**Fig. S19** Altering the fluorescence spectra ( $\lambda_{\text{ex}} = 350 \text{ nm}$ ) of a fluorescent **MBA** & **MBH** aggregate (comprising 99% water) while introducing the various concentrations of PA.; Inset: visualize color changes observation from (a) strong green & (b) yellow color to non-fluorescent colorless in the attendance of PA.

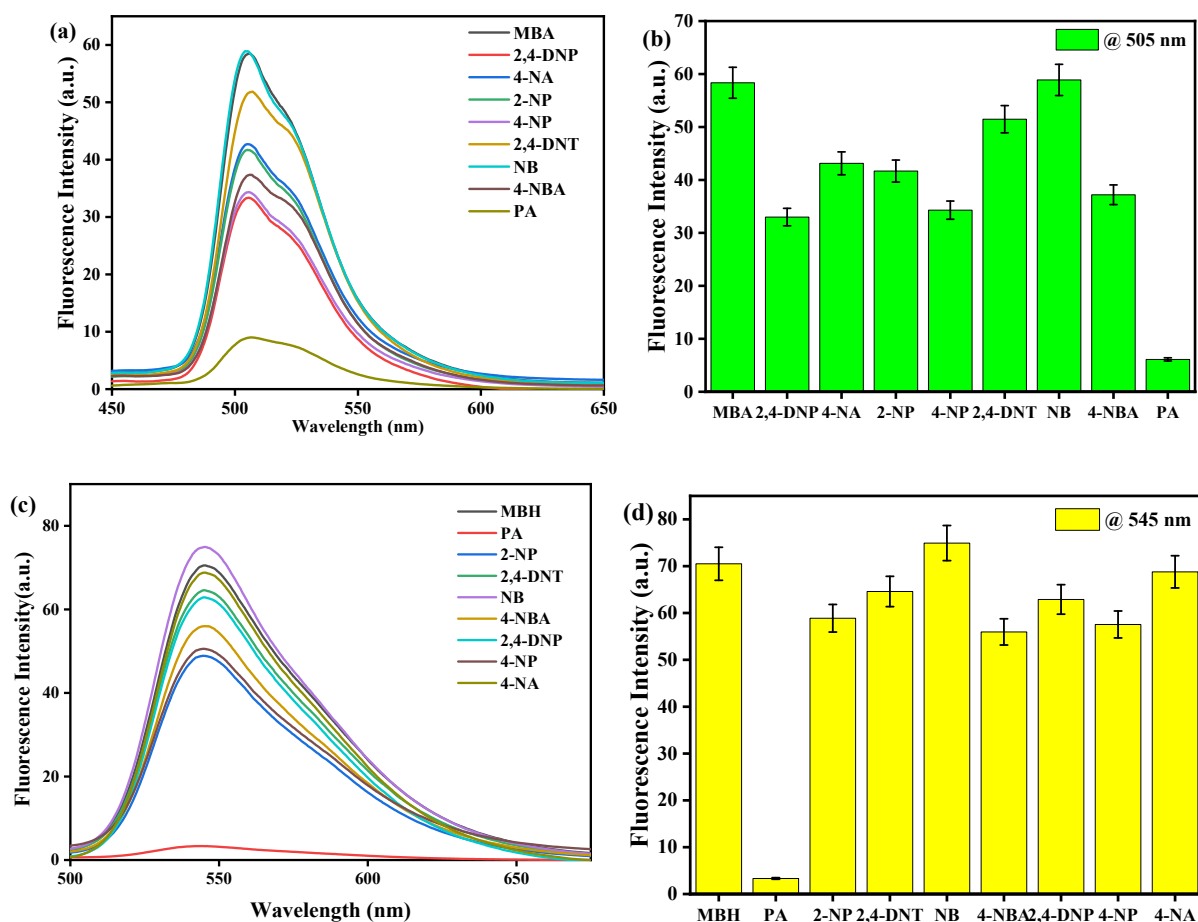

**Fig. S20** Emission spectra ( $\lambda_{\text{ex}} = 350 \text{ nm}$ ) of (a) **MBA** (c) **MBH** microparticles with several nitro aromatics compounds. Bar plot of fluorescence quenching of (b) **MBA** (d) **MBH** microparticles after the addition of various nitroaromatic compounds.

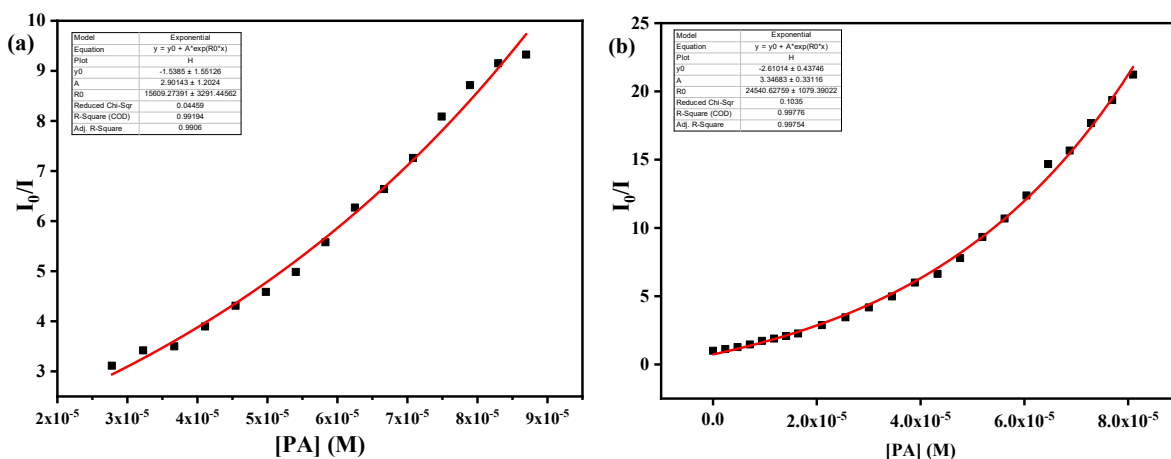

**Fig. S21** Stern-Volmer plot of the quenching of aggregated (a) MBA and (b) MBH on interaction with the PA.

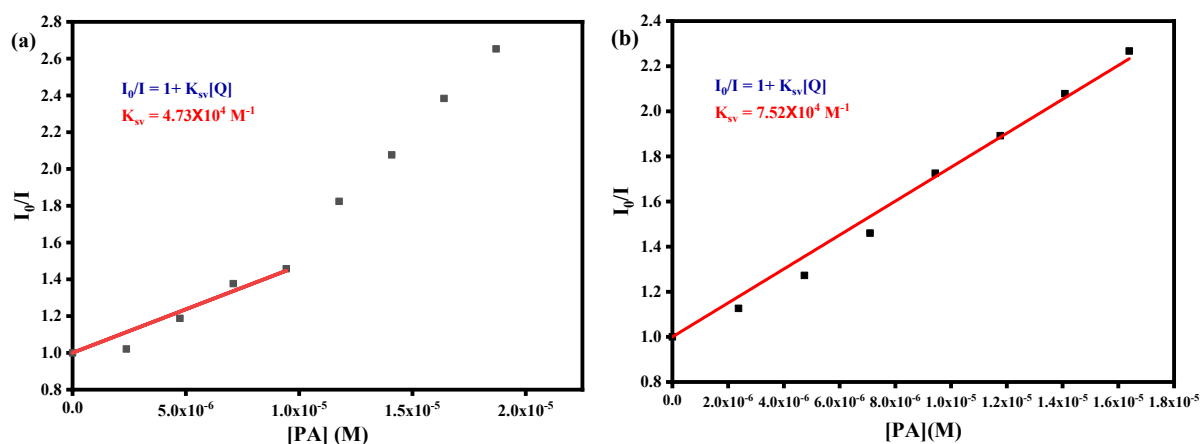

**Fig. S22** Linear plot for the calculation of dynamic quenching constant (a) MBA and (b) MBH.

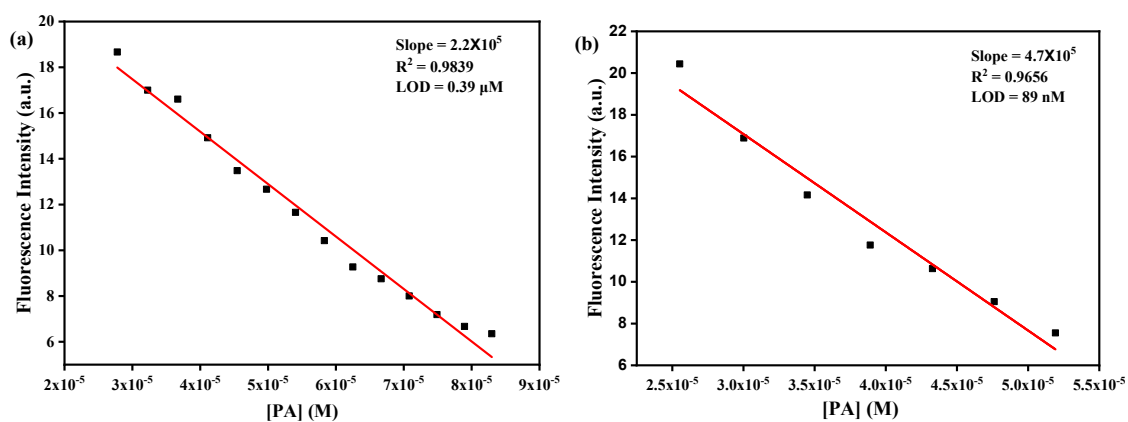

**Fig. S23** The linear calibrations plot the [PA] vs. photoluminescence to estimate the LOD value for the recognition of PA ions utilizing microparticles of (a) **MBA** and (b) **MBH**, respectively.

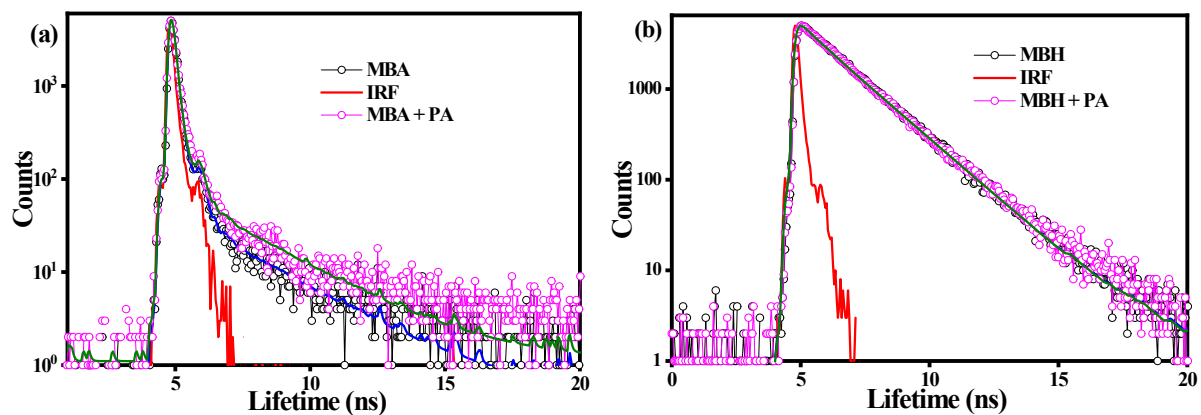

**Fig. S24:** Fluorescence lifetime decay profile of (a) **MBA** and (b) **MBH** aggregated in the absence and presence of PA.

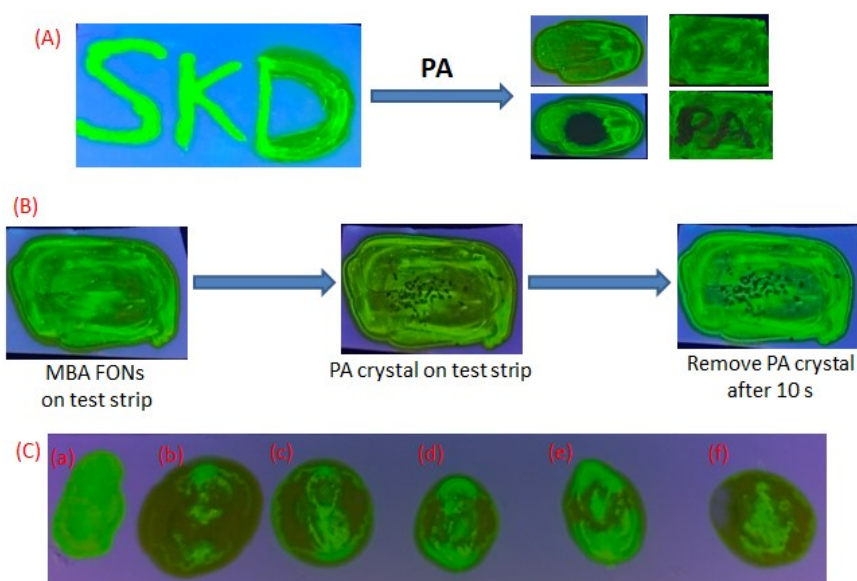

**Fig. S25** (A) Pictorial representation of **MBA** microparticles absorbed test strip before and after addition of PA. (B) Fluorescence image of PA crystal on the test strip and remove PA crystal after 10 s. (C) Fluorescence test strip image after the introduction of various concentrations of PA (a) **MBA** microparticles, (b)  $10^{-3}$ , (c)  $10^{-4}$ , (d)  $10^{-5}$ , (e)  $10^{-6}$ , (f)  $10^{-7}$ .

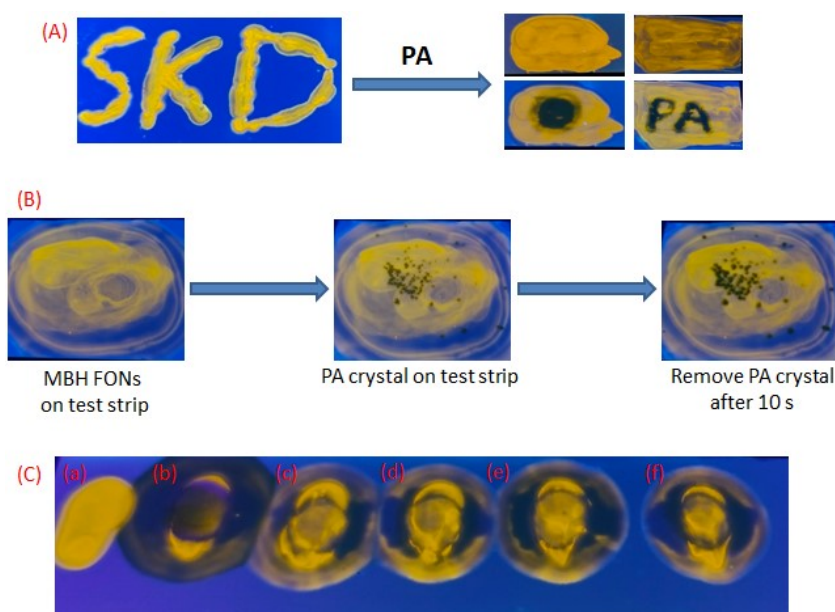

**Fig. S26** (A) Pictorial representation of **MBH** microparticles absorbed test strip before and after addition of PA. (B) Fluorescence image of PA crystal on the test strip and remove PA crystal after 10 s. (C) Fluorescence test strip image after the introduction of various concentrations of PA (a) **MBH** microparticles, (b)  $10^{-3}$ , (c)  $10^{-4}$ , (d)  $10^{-5}$ , (e)  $10^{-6}$ , (f)  $10^{-7}$ .

**Table S1:** Comparison of the detection limit, and the solvent used for the detection of PA by various chemosensors.

| Sl. No | Sensor                                                                             | Solvent        | LOD                          | Ref.         |
|--------|------------------------------------------------------------------------------------|----------------|------------------------------|--------------|
| 1      | Methylenediamine based                                                             | 90% water-DMSO | 5.97 nM, 0.39 $\mu$ M, 89 nM | Current work |
| 2      | Neutral red                                                                        | ACN            | 0.639 $\mu$ M                | 1            |
| 3      | Dabsyl derivative                                                                  | ACN            | 7.2 $\mu$ M                  | 2            |
| 4      | ((E)-2-(4-(bis(pyrin-2-ylmethyl)amino)styryl)-3-ethylbenzo[d]thiazol-3-ium iodide) | ACN            | 1.59 $\mu$ M                 | 3            |
| 5      | Thiophene based probe                                                              | THF            | 5.7 $\mu$ M                  | 4            |
| 6      | FRET-based rhodamine derivative                                                    | Ethanol        | 0.820 $\mu$ M                | 5            |
| 7      | Zr(IV) based MOF                                                                   | Methanol       | 1.63 $\mu$ M                 | 6            |
| 8      | 9-Anthracenecarboxamide appended probes (1-3)                                      | Ethanol        | 1 $\mu$ M                    | 7            |
| 9      | (E)-4-(2-(pyridin-4-                                                               | THF            | 1.75 $\mu$ M                 | 8            |

|    |                                                                 |                                      |                    |    |
|----|-----------------------------------------------------------------|--------------------------------------|--------------------|----|
|    | yl)vinyl)aniline                                                |                                      |                    |    |
| 10 | unsymmetrical boron detonate complexes                          | Dichloromethane (CHCl <sub>2</sub> ) | 21.5 μM            | 9  |
| 11 | Lanthanide-based coordination polymer                           | Chloroform                           | 98 μM              | 10 |
| 12 | Microporous polymer based on fluorescein                        | THF                                  | 0.722 μM           | 11 |
| 13 | 1,3,5-tris(4'-(N,N-dimethylamino)phenyl)benzene                 | ACN                                  | 6.55 μM            | 12 |
| 14 | 2,6-Divinylpyridine-appended anthracene derivative              | THF                                  | 2.184 μM           | 13 |
| 15 | 1- imidazolyl methyl pyrene-based sensor                        | Toluene                              | 2.515 μM           | 14 |
| 16 | dodecylbenzene-sulfonic acid (DBSA)-doped polyaniline           | N-Methyl-2-pyrrolidone               | 1.00 μM            | 15 |
| 17 | anthracene-functionalized fluorescent tris-imidazolium sensor 1 | DMSO                                 | 2.039 μM           | 16 |
|    | sensor 2                                                        |                                      | 1.545 μM           |    |
| 18 | meso diamino phenyl 1, 3, 5, 7-tetramethyl BODIPY dye           | CH <sub>3</sub> CN                   | NA                 | 17 |
| 19 | tetraphenyl calix[4]arene                                       | THF                                  | 1.54 μM            | 18 |
| 20 | Tb-based MOF                                                    | Methanol                             | NA                 | 19 |
| 21 | δ, α-unsaturated β-ketothiolester                               | THF                                  | 16 μM              | 20 |
| 22 | AIE-based azine derivatives                                     | THF                                  | 26 μM              | 21 |
| 23 | Perylene diimide probes                                         | DMF                                  | 1.0 μM             | 22 |
| 24 | 2-arylbenzothiazoles derivatives                                | Chloroform                           | 21.6 μM<br>19.0 μM | 23 |

## References

- 1 P. Sarkar, N. Tohora, M. Mahato, S. Ahamed, T. Sultana and S. K. Das, *J. Fluoresc.*, 2023, **1**, 1–17.
- 2 P. Kumar, D. Arya, D. Nain, A. Singh, A. Ghosh and D. A. Jose, *Dye. Pigment.*, 2019, **166**, 443–450.
- 3 A. Ghosh, S. K. Seth, A. Ghosh, P. Pattanayak, A. Mallick and P. Purkayastha, *Chem. – An Asian J.*, 2021, **16**, 1157–1164.
- 4 X. Lu, G. Zhang, D. Li, X. Tian, W. Ma, S. Li, Q. Zhang, H. Zhou, J. Wu and Y. Tian,



- Dye. Pigment.*, 2019, **170**, 107641.
- 5 E. Zhang, P. Ju, P. Guo, X. Hou, X. Hou, H. Lv, J. J. Wang and Y. Zhang, *RSC Adv.*, 2018, **8**, 31658–31665.
- 6 M. Sk and S. Biswas, *CrystEngComm*, 2016, **18**, 3104–3113.
- 7 A. Pandith, A. Kumar, J. Y. Lee and H. S. Kim, *Tetrahedron Lett.*, 2015, **56**, 7094–7099.
- 8 J. Pan, F. Tang, A. Ding, L. Kong, L. Yang, X. Tao, Y. Tian and J. Yang, *RSC Adv.*, 2014, **5**, 191–195.
- 9 S. Sriram Babu and S. Shanmugam, *J. Mater. Chem. C*, 2017, **5**, 4788–4796.
- 10 S. Srivastava, B. K. Gupta and R. Gupta, *Cryst. Growth Des.*, 2017, **17**, 3907–3916.
- 11 T. M. Geng, S. N. Ye, Y. Wang, H. Zhu, X. Wang and X. Liu, *Talanta*, 2017, **165**, 282–288.
- 12 P. Vishnoi, S. Sen, G. N. Patwari and R. Murugavel, *New J. Chem.*, 2015, **39**, 886–892.
- 13 D. C. Santra, M. K. Bera, P. K. Sukul and S. Malik, *Chem. – A Eur. J.*, 2016, **22**, 2012–2019.
- 14 R. Sodkhomkhum, M. Masik, S. Watchasit, C. Suksai, J. Boonmak, S. Youngme, N. Wanichacheva and V. Ervithayasuporn, *Sensors Actuators B Chem.*, 2017, **245**, 665–673.
- 15 V. Lakshmidēvi, C. V. Yelamaggad and A. Venkataraman, *ChemistrySelect*, 2018, **3**, 2655–2664.
- 16 B. Roy, A. K. Bar, B. Gole and P. S. Mukherjee, *J. Org. Chem.*, 2013, **78**, 1306–1310.
- 17 Y. Erande, S. Chemate, A. More and N. Sekar, *RSC Adv.*, 2015, **5**, 89482–89487.
- 18 S. K. Dinda, M. A. Hussain, A. Upadhyay and C. P. Rao,  
DOI:10.1021/acsomega.9b02855.

- 19 P. Ju, E. Zhang, L. Jiang, Z. Zhang, X. Hou, Y. Zhang, H. Yang and J. Wang, *RSC Adv.*, 2018, **8**, 21671–21678.
- 20 S. S. Babu and S. Shanmugam, *ChemistrySelect*, 2018, **3**, 4075–4081.
- 21 M. Sathiyaraj, K. Pavithra and V. Thiagarajan, *New J. Chem.*, 2020, **44**, 8402–8411.
- 22 P. S. Hariharan, J. Pitchaimani, V. Madhu and S. P. Anthony, *J. Fluoresc.*, 2016, **26**, 395–401.
- 23 S. Chaudhary, H. Sharma and M. D. Milton, *ChemistrySelect*, 2018, **3**, 4598–4608.
